# Supplementary material for: A giant negative electrocaloric effect in Eu-doped PbZrO3 thin films
Source: Royal Society of Chemistry journal article supplement (doi:10.1039/c6tc00218h), 2016-01-01
Supplement: c6tc00218h1.pdf [file c6tc00218h1.pdf]

## Supporting Information

### Giant Negative Electrocaloric Effect in Eu-doped PbZrO<sub>3</sub> Thin Films

Mao Ye,<sup>a,b</sup> Tao Li,<sup>a,b,c</sup> Qiu Sun,<sup>d</sup> Zhikai Liu,<sup>d</sup> Biaolin Peng,<sup>a,b,c</sup> Chuanwei Huang,<sup>a</sup> Peng Lin,<sup>a</sup>

Shanming Ke,<sup>\*a</sup> Xierong Zeng,<sup>a</sup> Xiang Peng,<sup>b</sup> Lang Chen,<sup>e</sup> and Haitao Huang<sup>\*c</sup>

\* Corresponding author: [smke@szu.edu.cn](mailto:smke@szu.edu.cn), and [aphuang@polyu.edu.hk](mailto:aphuang@polyu.edu.hk)

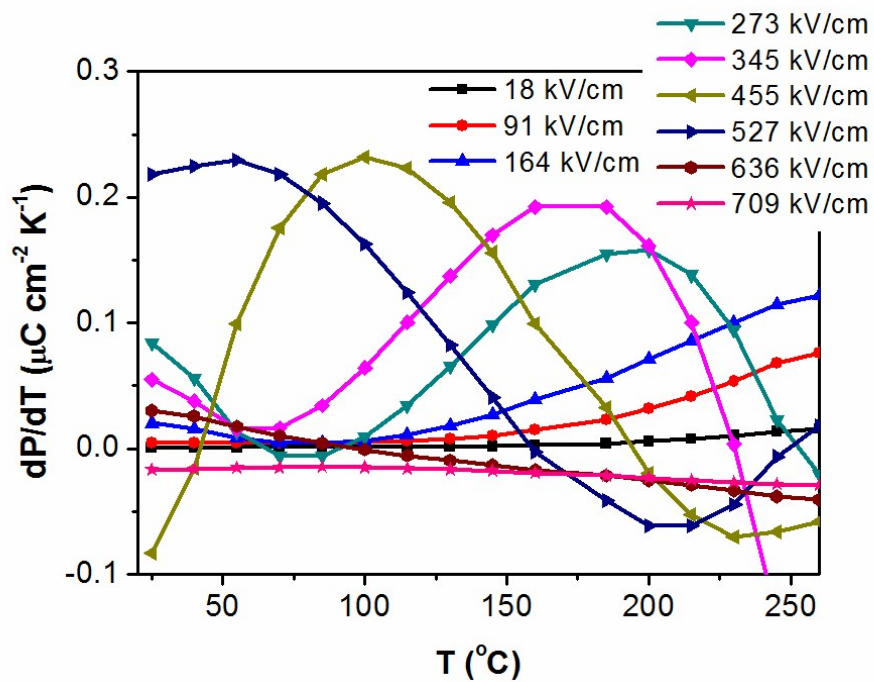

Figure S1. Pyroelectric coefficient ( $dP/dT$ ) as a function of temperature for electric field

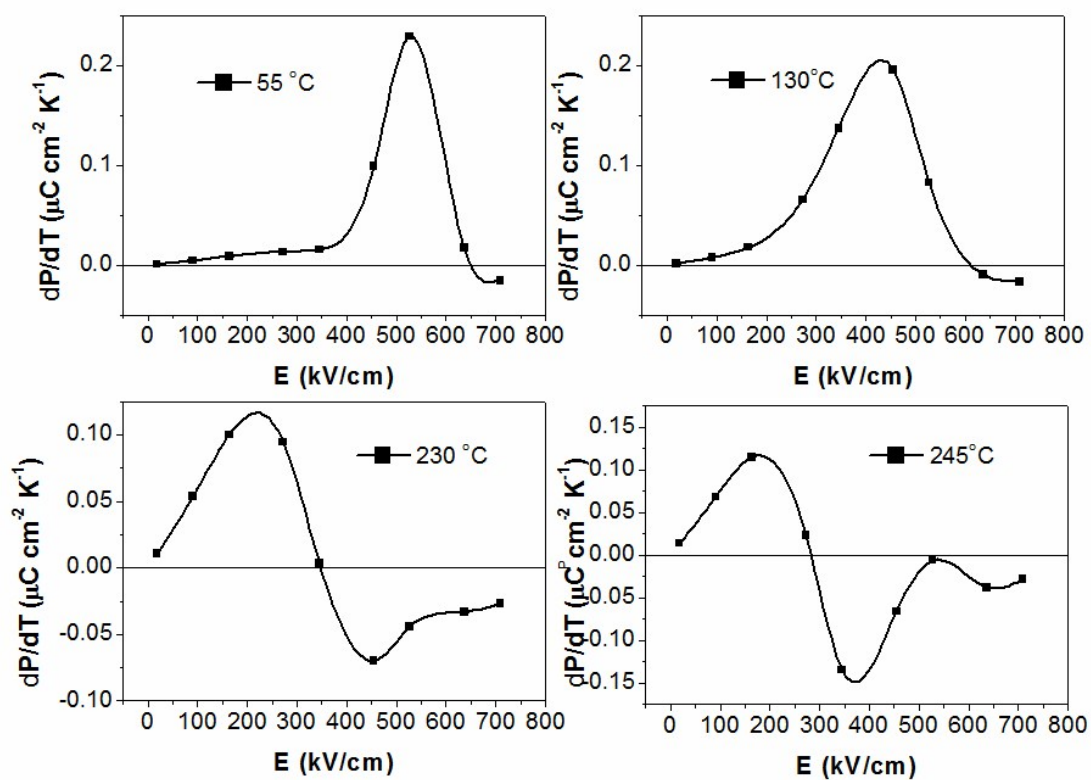

**Figure S2.** Pyroelectric coefficient ( $dP/dT$ ) as a function of electric field for temperature.

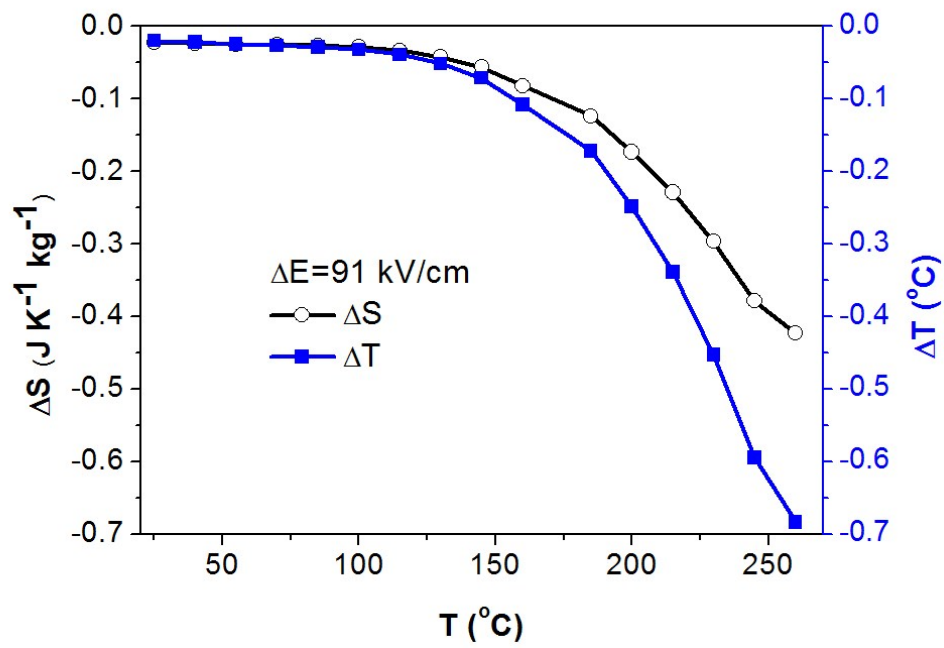

**Figure S3.**  $\Delta S$  and  $\Delta T$  under the applied field of  $\Delta E = E_2 - E_1 = 91 \text{ kV cm}^{-1}$ .

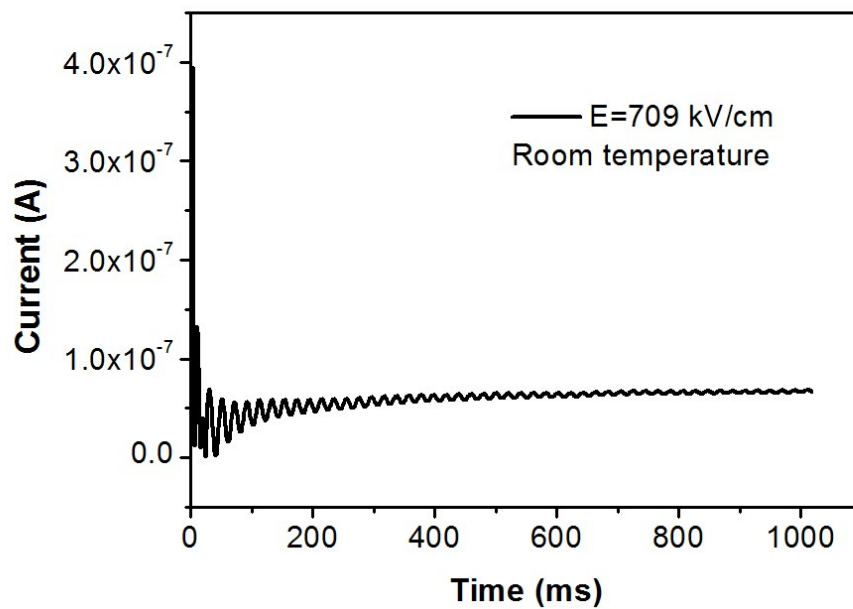

**Figure S4.** Leakage current  $I(t)$  in Eu doped PZ thin film at room temperature.
